# Supplementary material for: GWAS of human bitter taste perception identifies new loci and reveals additional complexity of bitter taste genetics
Source: PubMed Central journal article supplement — Hum Mol Genet. 2013 Aug 20;23(1):259–67. doi: 10.1093/hmg/ddt404 (PMC3857948; doi:10.1093/hmg/ddt404), 2013-08-20
Supplement: supp_ddt404_ddt404supp.pdf [file supp_ddt404_ddt404supp.pdf]

# GWAS OF HUMAN BITTER TASTE PERCEPTION IDENTIFIES NEW LOCI AND REVEALS ADDITIONAL COMPLEXITY OF BITTER TASTE GENETICS

## SUPPLEMENTARY DATA

Mirko Ledda, Zoltán Kutalik, Maria C. Souza Destito, Milena M. Souza, Cintia A. Cirillo, Amabilene Zamboni, Nathalie Martin, Edgard Morya, Koichi Sameshima, Jacques S. Beckmann, Johannes le Coutre, Sven Bergmann, Ulrich K. Genick

**Figure S1. The study panel represents a continuous admixture of diverse genetic ancestries.** A scatter plot of principal components one (PC1) and two (PC2) of study participants' genotype data show the admixed nature of the study population's genetic ancestries. Comparison to HAPMAP population data sets (not shown) indicate that PC1 represents the African-European axis while PC2 represents the European-Asian axis.

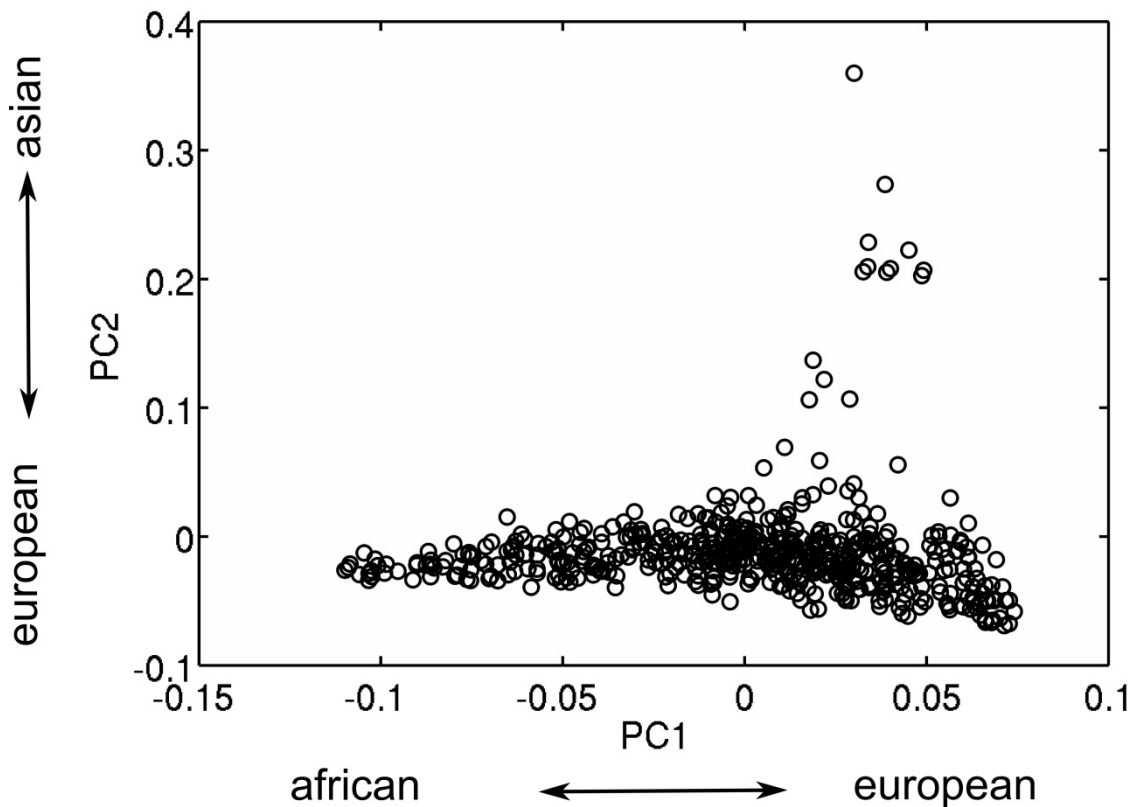

**Figure S2. Graphical representation of the overall taste sensitivity parameter concept.** Taste detection thresholds tend to be log-normally distributed. Detection thresholds are therefore log-transformed prior to the subsequent steps (note log-scale of x-axis). Panel (a) shows distributions of the detection thresholds for three different taste compounds (red, green and blue). The detection thresholds of one selected individual for these three taste compounds are shown by large dots. (b) The distribution curves are aligned along the x-axis so that their peaks fall onto the zero position. (c) The distributions are now stretched along the x-axis so that they all have unit width. This step converts the x-axis values into z-scores. The individual's overall taste sensitivity is then computed as the average of the z-scores for the three compounds.

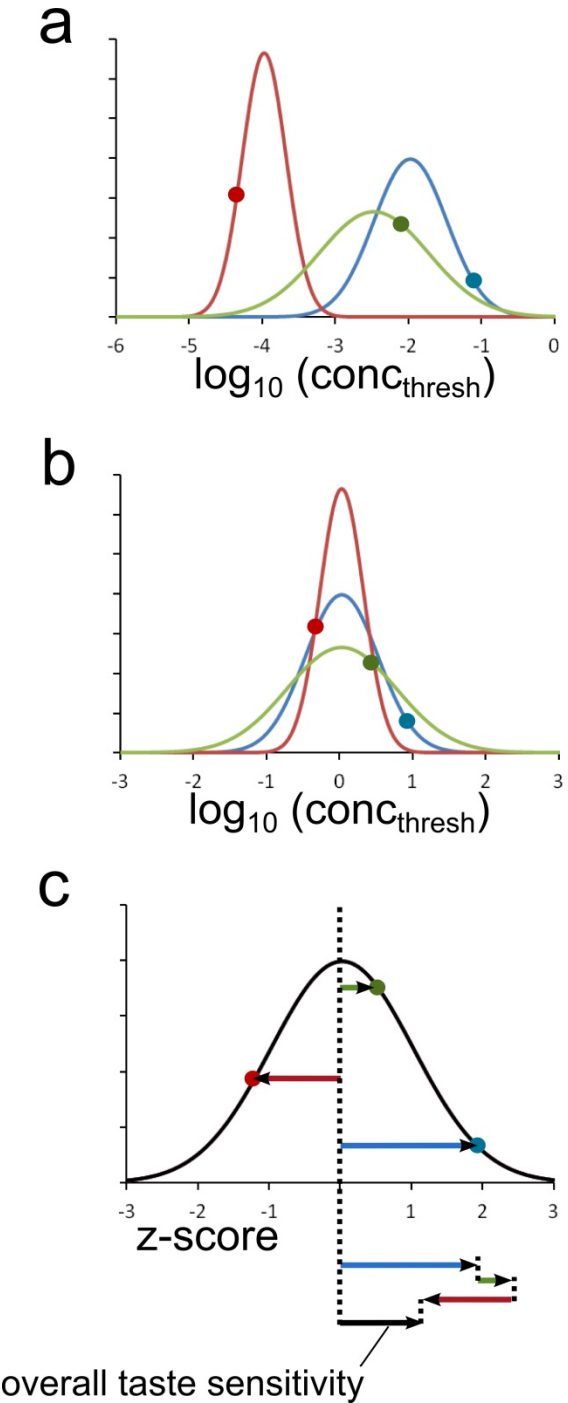

**Figure S3. Effect of OTS correction on GWAS p-values for PROP, quinine and caffeine detection thresholds.** The panels show scatter plots in which the changes in p-value resulting from OTS correction ( $\Delta p = p_{\text{OTS corrected}} - p_{\text{non-corrected}}$ ) are plotted against the respective p-value prior to correction for each of the SNPs included in the GWAS. Positive  $\Delta p$ -values indicate an association that is strengthened as a result of OTS correction. The dotted line represents the threshold for genome-wide significance and highlighted in red are SNPs showing genome-wide significance after OTS correction. The plots were generated using the results from the discovery cohort (504 subjects). Panels **a,b** and **c** show the results of this analysis for PROP, quinine and caffeine detection threshold respectively. Panel **d** shows the results of a bootstrapping test to determine if the observed boost for highly associated p-values could occur by chance. For this we randomly shuffled caffeine detection thresholds across subjects followed by a GWAS with both uncorrected and OTS corrected randomized thresholds. This procedure was repeated 100 times and all p-values were plotted.

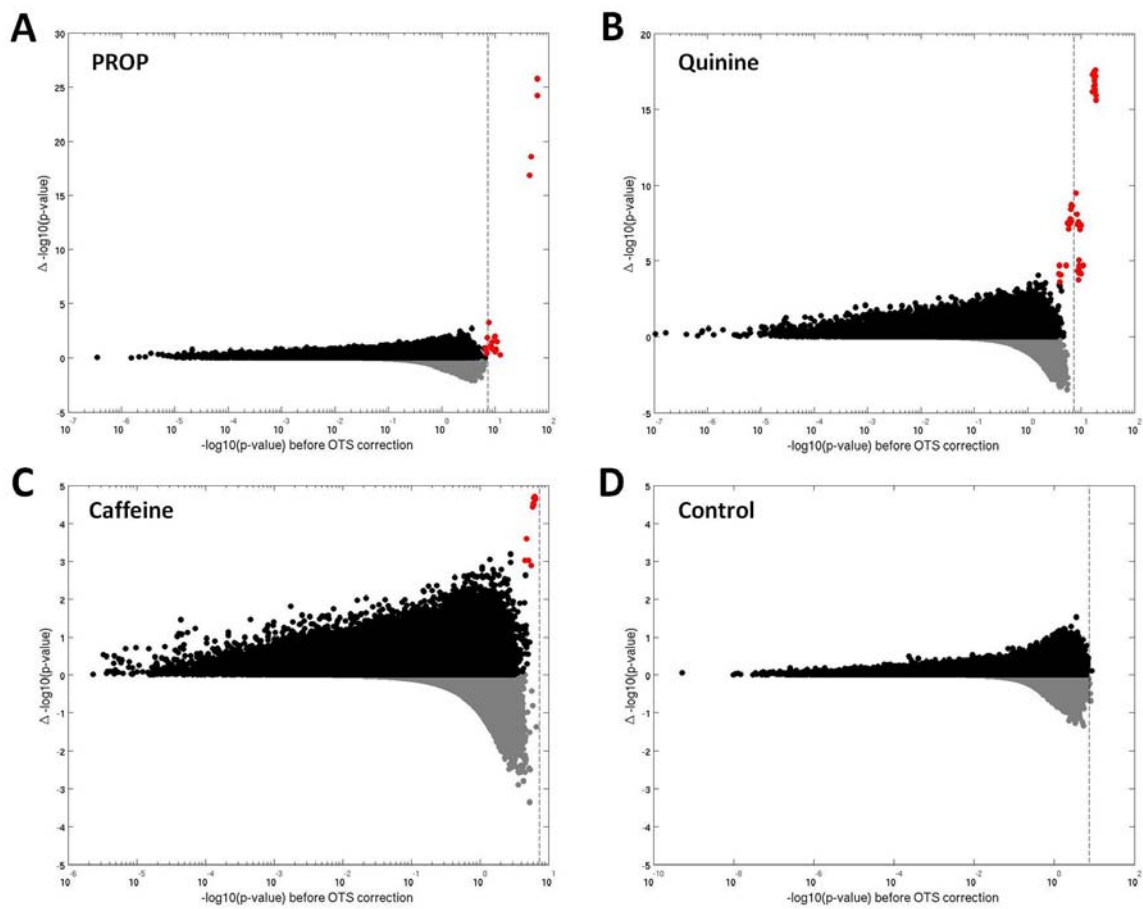

**Table S1.** GWAS results with log<sub>10</sub>-transformed caffeine and quinine thresholds for all sequenced SNPs in the bitter taste receptor cluster on chromosome 12 (104 subjects). Associations are filtered for MAF > 5%, p<sub>HW</sub> > 10<sup>-5</sup> and call rates > 0.90.

MAF : Minor allele frequency ; p<sub>HW</sub> : Hardy-Weinberg p-value

\* Based on human genome build 36.1

| SNP name   | Chr* | Position* | MAF   | p <sub>HW</sub> | Call rate | Caffeine |                | Quinine |                | Function     | Functional class |
|------------|------|-----------|-------|-----------------|-----------|----------|----------------|---------|----------------|--------------|------------------|
|            |      |           |       |                 |           | p        | r <sup>2</sup> | p       | r <sup>2</sup> |              |                  |
| NRC932     | 12   | 11081963  | 7.0%  | 3.5E-01         | 0.91      | 4.5E-01  | 0.6%           | 1.4E-01 | 2.4%           | intron       | neutral          |
| NRC65      | 12   | 11129812  | 8.9%  | 2.2E-01         | 0.91      | 9.5E-01  | 0.0%           | 5.4E-04 | 12.1%          | intron       |                  |
| NRC415     | 12   | 11066845  | 9.5%  | 1.9E-01         | 0.91      | 3.3E-01  | 1.1%           | 8.0E-03 | 7.5%           |              |                  |
| NRC795     | 12   | 11142550  | 10.1% | 1.6E-01         | 0.91      | 9.6E-01  | 0.0%           | 3.6E-01 | 1.0%           | intron       |                  |
| NRC2065    | 12   | 11142551  | 11.4% | 1.1E-01         | 0.91      | 9.7E-01  | 0.0%           | 7.2E-01 | 0.1%           | missense     |                  |
| rs35972994 | 12   | 11081079  | 13.3% | 5.4E-02         | 0.91      | 8.0E-01  | 0.1%           | 1.6E-01 | 2.2%           | intron       |                  |
| NRC204     | 12   | 11081594  | 16.5% | 1.3E-02         | 0.91      | 4.3E-02  | 4.5%           | 1.0E-02 | 7.0%           |              |                  |
| NRC1789    | 12   | 11129152  | 19.6% | 2.2E-03         | 0.91      | 4.8E-01  | 0.6%           | 6.9E-01 | 0.2%           | intron       |                  |
| rs11054160 | 12   | 11053800  | 26.6% | 1.0E-05         | 0.91      | 5.7E-02  | 4.0%           | 1.1E-02 | 6.9%           | intron       |                  |
| rs7135941  | 12   | 11042236  | 29.1% | 4.3E-05         | 0.91      | 5.1E-02  | 4.2%           | 8.6E-03 | 7.3%           | intron       |                  |
| rs2888682  | 12   | 11093467  | 38.0% | 1.5E-02         | 0.91      | 4.1E-01  | 0.8%           | 6.6E-06 | 18.9%          | intron       |                  |
| rs2600333  | 12   | 11142297  | 39.2% | 1.0E-02         | 0.91      | 5.0E-01  | 0.5%           | 4.1E-05 | 16.2%          |              |                  |
| rs2255156  | 12   | 11110793  | 49.4% | 8.3E-04         | 0.91      | 2.3E-01  | 1.6%           | 4.7E-02 | 4.3%           | missense     |                  |
| rs2255155  | 12   | 11110795  | 49.4% | 8.3E-04         | 0.91      | 2.3E-01  | 1.6%           | 4.7E-02 | 4.3%           | intron       |                  |
| NRC1768    | 12   | 11076728  | 5.0%  | 5.1E-01         | 0.92      | 3.8E-01  | 0.9%           | 2.8E-01 | 1.3%           | intron       |                  |
| NRC1974    | 12   | 11066827  | 9.4%  | 1.9E-01         | 0.92      | 6.5E-01  | 0.2%           | 1.1E-02 | 7.0%           |              |                  |
| rs2597994  | 12   | 11097484  | 40.0% | 3.5E-02         | 0.92      | 2.9E-01  | 1.3%           | 2.2E-05 | 17.2%          | intron       |                  |
| rs2599410  | 12   | 11110929  | 49.4% | 5.0E-04         | 0.92      | 3.6E-01  | 1.0%           | 2.4E-03 | 9.6%           |              |                  |
| rs2597977  | 12   | 11081128  | 15.4% | 2.0E-02         | 0.93      | 1.2E-01  | 2.7%           | 9.5E-02 | 3.1%           | missense     |                  |
| rs10772398 | 12   | 11030856  | 24.1% | 1.5E-01         | 0.93      | 1.0E-01  | 2.9%           | 4.7E-01 | 0.6%           | intron       | neutral          |
| rs12311490 | 12   | 11038848  | 28.4% | 2.4E-05         | 0.93      | 1.7E-01  | 2.1%           | 1.3E-02 | 6.6%           | missense     |                  |
| rs11054158 | 12   | 11053554  | 28.4% | 2.4E-05         | 0.93      | 2.3E-01  | 1.6%           | 9.5E-03 | 7.2%           | intron       |                  |
| rs10772419 | 12   | 11064757  | 37.7% | 1.9E-02         | 0.93      | 3.5E-01  | 1.0%           | 2.6E-05 | 16.9%          | intron       |                  |
| rs2599394  | 12   | 11092896  | 38.3% | 3.7E-02         | 0.93      | 4.6E-01  | 0.6%           | 6.7E-06 | 18.9%          |              |                  |
| rs2708363  | 12   | 11144422  | 41.4% | 7.2E-03         | 0.93      | 3.0E-01  | 1.2%           | 3.4E-06 | 19.9%          | intron       |                  |
| rs10845298 | 12   | 11112695  | 49.4% | 3.0E-04         | 0.93      | 2.5E-01  | 1.5%           | 7.2E-03 | 7.7%           | intron       |                  |
| NRC1323    | 12   | 11099244  | 9.8%  | 1.7E-01         | 0.94      | 3.6E-01  | 0.9%           | 5.2E-01 | 0.5%           | intron       |                  |
| NRC2107    | 12   | 11142729  | 13.4% | 4.7E-02         | 0.94      | 6.6E-01  | 0.2%           | 1.6E-01 | 2.3%           | intron       |                  |
| rs12371085 | 12   | 11068028  | 15.2% | 2.1E-02         | 0.94      | 2.4E-01  | 1.6%           | 8.2E-02 | 3.4%           | intron       |                  |
| rs3911150  | 12   | 11093515  | 15.9% | 2.7E-01         | 0.94      | 2.4E-03  | 9.6%           | 9.8E-01 | 0.0%           | intron       |                  |
| rs9803044  | 12   | 11122809  | 17.1% | 8.4E-03         | 0.94      | 4.3E-02  | 4.5%           | 1.4E-02 | 6.4%           | intron       |                  |
| rs7959172  | 12   | 11145474  | 18.3% | 4.4E-01         | 0.94      | 5.6E-01  | 0.4%           | 2.8E-02 | 5.3%           | intron       |                  |
| NRC246     | 12   | 11083263  | 21.3% | 5.1E-04         | 0.94      | 2.3E-02  | 5.6%           | 2.4E-02 | 5.5%           | intron       |                  |
| NRC2260    | 12   | 11135775  | 22.0% | 3.2E-04         | 0.94      | 3.0E-01  | 1.2%           | 2.2E-01 | 1.7%           | intron       |                  |
| rs7304447  | 12   | 11055369  | 26.8% | 5.0E-05         | 0.94      | 2.4E-01  | 1.5%           | 8.5E-03 | 7.4%           | intron       |                  |
| rs2597961  | 12   | 11149770  | 37.8% | 4.5E-03         | 0.94      | 4.4E-01  | 0.7%           | 2.0E-05 | 17.3%          | intron       |                  |
| NRC2687    | 12   | 11093113  | 5.4%  | 4.6E-01         | 0.95      | 4.7E-01  | 0.6%           | 9.0E-01 | 0.0%           | coding-synon |                  |
| NRC437     | 12   | 11143054  | 6.0%  | 4.1E-01         | 0.95      | 3.7E-01  | 0.9%           | 1.4E-01 | 2.4%           | intron       |                  |
| NRC2622    | 12   | 11099157  | 6.6%  | 3.6E-01         | 0.95      | 6.1E-01  | 0.3%           | 2.4E-02 | 5.6%           | intron       |                  |

|            |    |          |       |         |      |         |      |         |       |              |         |
|------------|----|----------|-------|---------|------|---------|------|---------|-------|--------------|---------|
| NRC1191    | 12 | 11135737 | 7.2%  | 3.2E-01 | 0.95 | 3.8E-01 | 0.9% | 1.7E-02 | 6.1%  | intron       |         |
| NRC342     | 12 | 11093513 | 8.4%  | 2.4E-01 | 0.95 | 4.4E-01 | 0.7% | 5.8E-01 | 0.4%  | intron       |         |
| NRC1309    | 12 | 11135750 | 8.4%  | 2.4E-01 | 0.95 | 5.9E-01 | 0.3% | 5.7E-02 | 4.0%  | intron       |         |
| NRC1526    | 12 | 11030814 | 9.6%  | 1.7E-01 | 0.95 | 4.5E-01 | 0.7% | 4.8E-01 | 0.6%  | intron       |         |
| NRC542     | 12 | 11082011 | 10.2% | 1.4E-01 | 0.95 | 4.9E-01 | 0.5% | 2.0E-02 | 5.9%  | intron       |         |
| NRC1651    | 12 | 11106661 | 11.4% | 9.6E-02 | 0.95 | 8.6E-01 | 0.0% | 4.3E-01 | 0.7%  | intron       |         |
| rs3553142  | 12 | 11081113 | 13.9% | 3.8E-02 | 0.95 | 4.1E-01 | 0.8% | 2.3E-01 | 1.6%  |              |         |
| rs2418305  | 12 | 11109820 | 16.3% | 1.2E-02 | 0.95 | 4.6E-02 | 4.4% | 6.2E-01 | 0.3%  | intron       |         |
| NRC2566    | 12 | 11135645 | 20.5% | 1.7E-05 | 0.95 | 3.2E-01 | 1.1% | 2.5E-02 | 5.4%  | intron       |         |
| rs7311538  | 12 | 11055064 | 27.7% | 1.3E-05 | 0.95 | 1.9E-01 | 1.9% | 8.3E-03 | 7.4%  | intron       |         |
| rs7301234  | 12 | 11042151 | 29.5% | 1.7E-05 | 0.95 | 1.4E-01 | 2.4% | 5.4E-03 | 8.2%  | intron       |         |
| rs2708366  | 12 | 11142361 | 39.8% | 1.2E-02 | 0.95 | 3.2E-01 | 1.1% | 1.8E-06 | 20.8% | intron       |         |
| NRC12      | 12 | 11122800 | 46.4% | 7.4E-02 | 0.95 | 3.5E-01 | 1.0% | 1.5E-02 | 6.4%  | intron       |         |
| rs3983334  | 12 | 11109786 | 48.2% | 1.0E-03 | 0.95 | 1.9E-01 | 2.0% | 3.6E-02 | 4.8%  | intron       |         |
| NRC1634    | 12 | 11090715 | 5.4%  | 4.6E-01 | 0.97 | 7.1E-01 | 0.2% | 9.4E-01 | 0.0%  | intron       |         |
| NRC554     | 12 | 11099170 | 6.5%  | 3.6E-01 | 0.97 | 3.7E-01 | 0.9% | 1.3E-01 | 2.6%  | intron       |         |
| rs58622223 | 12 | 11055359 | 7.1%  | 2.6E-04 | 0.97 | 2.9E-01 | 1.3% | 4.2E-01 | 0.7%  | intron       |         |
| NRC73      | 12 | 11055706 | 7.1%  | 2.6E-04 | 0.97 | 3.0E-01 | 1.2% | 4.1E-01 | 0.8%  |              |         |
| NRC941     | 12 | 11081998 | 8.9%  | 2.0E-01 | 0.97 | 1.8E-01 | 2.0% | 1.5E-03 | 10.4% | intron       | neutral |
| NRC593     | 12 | 11133701 | 10.7% | 1.2E-01 | 0.97 | 7.5E-02 | 3.5% | 7.8E-01 | 0.1%  | intron       |         |
| NRC103     | 12 | 11138363 | 13.1% | 5.1E-02 | 0.97 | 6.7E-01 | 0.2% | 1.6E-01 | 2.3%  | intron       |         |
| NRC1920    | 12 | 11069804 | 13.7% | 4.0E-02 | 0.97 | 5.8E-01 | 0.3% | 6.6E-01 | 0.2%  | intron       |         |
| rs11612527 | 12 | 11072815 | 14.3% | 1.1E-01 | 0.97 | 9.9E-01 | 0.0% | 1.2E-02 | 6.8%  |              |         |
| rs7315455  | 12 | 11076336 | 17.3% | 5.9E-01 | 0.97 | 5.2E-01 | 0.5% | 1.2E-02 | 6.8%  | coding-synon |         |
| NRC2316    | 12 | 11093523 | 18.5% | 3.4E-03 | 0.97 | 4.5E-01 | 0.6% | 2.5E-01 | 1.5%  | intron       |         |
| rs10431300 | 12 | 11109681 | 19.0% | 2.3E-03 | 0.97 | 6.5E-02 | 3.8% | 1.6E-02 | 6.3%  | intron       |         |
| rs2708381  | 12 | 11105412 | 20.8% | 2.1E-01 | 0.97 | 5.7E-01 | 0.4% | 7.9E-03 | 7.5%  | intron       |         |
| NRC230     | 12 | 11083519 | 21.4% | 4.1E-04 | 0.97 | 3.3E-02 | 5.0% | 3.0E-02 | 5.2%  | intron       |         |
| rs11054152 | 12 | 11050779 | 28.0% | 3.3E-05 | 0.97 | 2.1E-01 | 1.7% | 8.0E-03 | 7.5%  | intron       |         |
| rs2597963  | 12 | 11149278 | 39.9% | 1.9E-02 | 0.97 | 4.2E-01 | 0.7% | 2.3E-06 | 20.4% | intron       |         |
| rs2708358  | 12 | 11149520 | 39.9% | 2.8E-03 | 0.97 | 3.8E-01 | 0.9% | 1.7E-06 | 20.8% | intron       |         |
| NRC319     | 12 | 11091336 | 5.9%  | 4.2E-01 | 0.98 | 7.1E-01 | 0.2% | 7.4E-01 | 0.1%  | intron       |         |
| rs56985810 | 12 | 11066344 | 7.1%  | 2.3E-04 | 0.98 | 2.8E-01 | 1.3% | 4.7E-01 | 0.6%  | utr-3        |         |
| NRC892     | 12 | 11136001 | 8.2%  | 2.4E-01 | 0.98 | 8.3E-01 | 0.1% | 7.9E-02 | 3.4%  | intron       |         |
| NRC2651    | 12 | 11107247 | 9.4%  | 1.8E-01 | 0.98 | 5.8E-01 | 0.3% | 9.6E-01 | 0.0%  | intron       |         |
| NRC2161    | 12 | 11109780 | 10.6% | 1.2E-01 | 0.98 | 7.7E-01 | 0.1% | 1.6E-02 | 6.3%  | utr-5        |         |
| NRC874     | 12 | 11083465 | 15.3% | 1.9E-02 | 0.98 | 6.8E-01 | 0.2% | 5.3E-02 | 4.1%  | missense     |         |
| rs7296803  | 12 | 11143041 | 15.3% | 1.9E-02 | 0.98 | 7.3E-01 | 0.1% | 7.2E-03 | 7.7%  | missense     |         |
| NRC1621    | 12 | 11135393 | 17.6% | 4.0E-04 | 0.98 | 6.9E-01 | 0.2% | 1.1E-03 | 10.9% |              |         |
| rs4763611  | 12 | 11056384 | 19.4% | 7.8E-02 | 0.98 | 6.1E-01 | 0.3% | 3.7E-03 | 8.8%  | intron       |         |
| rs11560811 | 12 | 11110637 | 19.4% | 1.7E-03 | 0.98 | 4.2E-02 | 4.5% | 1.0E-02 | 7.1%  | utr-3        |         |
| rs3983335  | 12 | 11109802 | 20.0% | 1.1E-03 | 0.98 | 1.7E-01 | 2.1% | 8.4E-02 | 3.3%  | intron       |         |
| NRC1550    | 12 | 11083314 | 20.6% | 7.2E-04 | 0.98 | 6.2E-02 | 3.9% | 3.2E-02 | 5.0%  | missense     | neutral |
| NRC801     | 12 | 11083336 | 20.6% | 7.2E-04 | 0.98 | 3.0E-02 | 5.1% | 1.4E-02 | 6.5%  | intron       |         |
| NRC939     | 12 | 11083575 | 21.2% | 4.6E-04 | 0.98 | 4.1E-02 | 4.6% | 1.9E-02 | 5.9%  | intron       |         |
| NRC670     | 12 | 11093748 | 24.1% | 3.4E-05 | 0.98 | 4.7E-01 | 0.6% | 2.2E-01 | 1.7%  | missense     |         |

|            |    |          |       |         |      |         |       |         |       |                |
|------------|----|----------|-------|---------|------|---------|-------|---------|-------|----------------|
| NRC1123    | 12 | 11135723 | 27.1% | 1.2E-02 | 0.98 | 8.4E-01 | 0.0%  | 3.0E-02 | 5.1%  | intron         |
| rs7304936  | 12 | 11055749 | 27.6% | 2.4E-05 | 0.98 | 1.9E-01 | 2.0%  | 6.7E-03 | 7.8%  |                |
| rs2597975  | 12 | 11144064 | 32.4% | 1.9E-05 | 0.98 | 2.9E-02 | 5.2%  | 2.1E-01 | 1.8%  | utr-3          |
| NRC2694    | 12 | 11135657 | 37.1% | 2.7E-01 | 0.98 | 3.0E-01 | 1.2%  | 6.3E-03 | 7.9%  | intron         |
| rs2443739  | 12 | 11149713 | 39.4% | 2.1E-03 | 0.98 | 4.4E-01 | 0.7%  | 2.4E-06 | 20.4% | intron         |
| rs10743937 | 12 | 11064722 | 40.6% | 1.5E-03 | 0.98 | 3.1E-01 | 1.2%  | 2.4E-06 | 20.3% | intron         |
| rs2600334  | 12 | 11142972 | 40.6% | 1.1E-02 | 0.98 | 3.4E-01 | 1.0%  | 1.2E-06 | 21.3% | missense       |
| rs12313469 | 12 | 11066354 | 41.2% | 3.7E-03 | 0.98 | 3.3E-01 | 1.1%  | 6.4E-06 | 19.0% | intron         |
| NRC581     | 12 | 11121610 | 47.1% | 8.2E-02 | 0.98 | 4.9E-01 | 0.5%  | 4.4E-04 | 12.4% | intron         |
| NRC2081    | 12 | 11090850 | 5.2%  | 4.7E-01 | 0.99 | 7.4E-01 | 0.1%  | 6.5E-02 | 3.8%  | intron         |
| NRC1249    | 12 | 11100769 | 5.2%  | 4.7E-01 | 0.99 | 1.9E-01 | 2.0%  | 6.9E-01 | 0.2%  | intron         |
| NRC1272    | 12 | 11083138 | 5.8%  | 4.2E-01 | 0.99 | 9.5E-01 | 0.0%  | 1.7E-01 | 2.2%  | intron         |
| NRC2032    | 12 | 11090836 | 10.5% | 1.3E-01 | 0.99 | 5.8E-01 | 0.4%  | 3.4E-02 | 4.9%  | intron         |
| rs2708379  | 12 | 11106296 | 10.5% | 1.3E-01 | 0.99 | 1.9E-01 | 1.9%  | 9.3E-01 | 0.0%  | intron         |
| rs55748583 | 12 | 11030979 | 14.5% | 1.5E-01 | 0.99 | 9.6E-04 | 11.1% | 7.7E-01 | 0.1%  | intron         |
| NRC982     | 12 | 11149337 | 14.5% | 2.6E-02 | 0.99 | 6.6E-01 | 0.2%  | 1.9E-01 | 1.9%  | intron         |
| NRC239     | 12 | 11029834 | 15.7% | 1.5E-02 | 0.99 | 6.3E-01 | 0.3%  | 4.9E-01 | 0.5%  | intron neutral |
| rs11054149 | 12 | 11046217 | 17.4% | 5.1E-01 | 0.99 | 5.7E-01 | 0.4%  | 8.9E-03 | 7.3%  | intron         |
| NRC1381    | 12 | 11103640 | 17.4% | 5.6E-03 | 0.99 | 5.6E-01 | 0.4%  | 6.2E-02 | 3.8%  | intron         |
| NRC1241    | 12 | 11083478 | 18.6% | 2.7E-03 | 0.99 | 9.3E-02 | 3.1%  | 3.1E-02 | 5.1%  | intron         |
| NRC1553    | 12 | 11093692 | 18.6% | 2.7E-03 | 0.99 | 2.1E-02 | 5.8%  | 6.9E-01 | 0.2%  | intron         |
| NRC1089    | 12 | 11105627 | 18.6% | 3.3E-01 | 0.99 | 5.2E-01 | 0.5%  | 6.9E-03 | 7.7%  | intron         |
| rs11533164 | 12 | 11110698 | 18.6% | 2.7E-03 | 0.99 | 8.5E-02 | 3.3%  | 1.3E-02 | 6.6%  | intron         |
| rs35860793 | 12 | 11147923 | 18.6% | 3.3E-01 | 0.99 | 5.2E-01 | 0.5%  | 6.9E-03 | 7.7%  | missense       |
| NRC1833    | 12 | 11083608 | 19.2% | 1.8E-03 | 0.99 | 5.3E-02 | 4.1%  | 7.6E-03 | 7.6%  | missense       |
| rs7136962  | 12 | 11032237 | 20.3% | 1.8E-01 | 0.99 | 6.6E-01 | 0.2%  | 3.6E-03 | 8.9%  |                |
| rs12581501 | 12 | 11045061 | 20.3% | 1.8E-01 | 0.99 | 6.4E-01 | 0.3%  | 4.2E-03 | 8.6%  | neutral        |
| rs2597990  | 12 | 11094726 | 20.3% | 2.2E-02 | 0.99 | 3.8E-03 | 8.8%  | 6.1E-01 | 0.3%  | intron         |
| rs11531976 | 12 | 11110607 | 20.3% | 1.4E-01 | 0.99 | 4.5E-02 | 4.4%  | 2.5E-03 | 9.5%  | intron         |
| NRC1311    | 12 | 11100785 | 22.1% | 2.0E-04 | 0.99 | 2.7E-01 | 1.4%  | 3.0E-01 | 1.2%  | utr-5          |
| NRC913     | 12 | 11092349 | 23.3% | 7.1E-05 | 0.99 | 8.7E-01 | 0.0%  | 1.0E-01 | 3.0%  | intron         |
| NRC2721    | 12 | 11092361 | 23.3% | 7.1E-05 | 0.99 | 4.4E-01 | 0.7%  | 3.5E-02 | 4.9%  | intron         |
| NRC1551    | 12 | 11099328 | 24.4% | 2.3E-05 | 0.99 | 1.4E-01 | 2.4%  | 4.1E-01 | 0.8%  | intron         |
| rs10845284 | 12 | 11049566 | 27.3% | 1.8E-05 | 0.99 | 2.5E-01 | 1.5%  | 4.9E-03 | 8.4%  | intron         |
| rs10732561 | 12 | 11062104 | 32.6% | 6.9E-04 | 0.99 | 2.6E-02 | 5.4%  | 2.8E-01 | 1.3%  | intron         |
| rs2597984  | 12 | 11091001 | 32.6% | 4.4E-05 | 0.99 | 3.1E-02 | 5.1%  | 2.4E-01 | 1.5%  | intron         |
| rs2708377  | 12 | 11107582 | 32.6% | 6.9E-04 | 0.99 | 3.6E-02 | 4.8%  | 2.1E-01 | 1.8%  | intron         |
| rs2597981  | 12 | 11083557 | 38.4% | 1.3E-01 | 0.99 | 3.5E-01 | 1.0%  | 9.2E-07 | 21.7% | intron         |
| rs2708319  | 12 | 11092308 | 39.0% | 5.8E-02 | 0.99 | 4.1E-01 | 0.8%  | 8.2E-07 | 21.8% | intron         |
| rs2443094  | 12 | 11142205 | 41.3% | 6.3E-03 | 0.99 | 3.6E-01 | 0.9%  | 6.3E-07 | 22.2% | intron         |
| rs2597973  | 12 | 11144393 | 41.3% | 6.3E-03 | 0.99 | 3.7E-01 | 0.9%  | 3.7E-07 | 22.9% | intron         |
| rs2708361  | 12 | 11147927 | 41.3% | 6.3E-03 | 0.99 | 3.6E-01 | 0.9%  | 6.0E-07 | 22.3% |                |
| NRC958     | 12 | 11135699 | 46.5% | 1.1E-01 | 0.99 | 1.2E-01 | 2.6%  | 7.0E-03 | 7.7%  | intron         |
| rs9777856  | 12 | 11094589 | 5.2%  | 4.7E-01 | 1.00 | 6.7E-01 | 0.2%  | 5.3E-02 | 4.1%  |                |
| NRC1821    | 12 | 11105566 | 5.2%  | 4.7E-01 | 1.00 | 4.7E-01 | 0.6%  | 1.3E-01 | 2.6%  | intron         |
| NRC869     | 12 | 11110575 | 5.2%  | 4.7E-01 | 1.00 | 1.0E-01 | 3.0%  | 3.3E-01 | 1.1%  | intron         |

|            |    |          |       |         |      |         |       |         |       |              |             |
|------------|----|----------|-------|---------|------|---------|-------|---------|-------|--------------|-------------|
| NRC1757    | 12 | 11058487 | 5.7%  | 4.2E-01 | 1.00 | 5.5E-01 | 0.4%  | 1.2E-01 | 2.7%  |              |             |
| NRC988     | 12 | 11109747 | 5.7%  | 4.2E-01 | 1.00 | 2.7E-02 | 5.3%  | 6.1E-01 | 0.3%  | intron       |             |
| NRC1727    | 12 | 11092430 | 6.3%  | 3.7E-01 | 1.00 | 5.7E-01 | 0.4%  | 3.5E-01 | 1.0%  | intron       | neutral     |
| NRC1663    | 12 | 11110574 | 6.3%  | 3.7E-01 | 1.00 | 6.4E-02 | 3.8%  | 4.6E-01 | 0.6%  | intron       |             |
| NRC673     | 12 | 11105713 | 6.9%  | 3.3E-01 | 1.00 | 6.3E-01 | 0.3%  | 6.6E-01 | 0.2%  | intron       | deleterious |
| NRC488     | 12 | 11074360 | 8.0%  | 2.5E-01 | 1.00 | 7.2E-01 | 0.1%  | 2.1E-01 | 1.8%  |              |             |
| NRC1341    | 12 | 11067579 | 9.8%  | 1.5E-01 | 1.00 | 3.6E-01 | 1.0%  | 7.1E-01 | 0.2%  | intron       |             |
| NRC1900    | 12 | 11074336 | 9.8%  | 1.5E-01 | 1.00 | 7.6E-01 | 0.1%  | 8.0E-01 | 0.1%  | intron       | neutral     |
| NRC2307    | 12 | 11099384 | 9.8%  | 1.5E-01 | 1.00 | 8.9E-01 | 0.0%  | 3.4E-01 | 1.0%  | intron       |             |
| NRC1696    | 12 | 11147880 | 9.8%  | 1.5E-01 | 1.00 | 9.3E-01 | 0.0%  | 5.2E-01 | 0.5%  | intron       |             |
| NRC663     | 12 | 11067557 | 10.3% | 1.3E-01 | 1.00 | 3.3E-01 | 1.1%  | 7.6E-01 | 0.1%  | intron       |             |
| NRC2184    | 12 | 11105889 | 10.3% | 1.3E-01 | 1.00 | 3.4E-02 | 4.9%  | 9.3E-01 | 0.0%  | intron       |             |
| NRC1102    | 12 | 11092390 | 10.9% | 1.1E-01 | 1.00 | 6.8E-01 | 0.2%  | 8.2E-01 | 0.1%  | intron       | none        |
| NRC2555    | 12 | 11099402 | 11.5% | 8.7E-02 | 1.00 | 7.3E-01 | 0.1%  | 2.7E-01 | 1.4%  | intron       |             |
| NRC647     | 12 | 11098032 | 12.1% | 7.0E-02 | 1.00 | 4.9E-01 | 0.5%  | 3.2E-01 | 1.1%  | intron       |             |
| NRC2182    | 12 | 11142997 | 12.1% | 7.0E-02 | 1.00 | 4.1E-01 | 0.8%  | 2.2E-01 | 1.7%  | utr-3        |             |
| NRC112     | 12 | 11058671 | 12.6% | 5.6E-02 | 1.00 | 1.2E-02 | 6.8%  | 1.5E-01 | 2.3%  | missense     |             |
| NRC2200    | 12 | 11041321 | 13.2% | 5.0E-02 | 1.00 | 6.4E-01 | 0.3%  | 2.5E-01 | 1.5%  | intron       |             |
| NRC273     | 12 | 11094917 | 13.8% | 3.5E-02 | 1.00 | 8.7E-02 | 3.3%  | 7.5E-01 | 0.1%  | intron       |             |
| NRC908     | 12 | 11065569 | 14.4% | 2.7E-02 | 1.00 | 8.7E-01 | 0.0%  | 1.4E-01 | 2.5%  | intron       | neutral     |
| NRC341     | 12 | 11074458 | 14.4% | 1.4E-01 | 1.00 | 8.5E-04 | 11.4% | 8.0E-01 | 0.1%  | coding-synon |             |
| NRC2591    | 12 | 11135912 | 14.9% | 2.0E-02 | 1.00 | 4.5E-01 | 0.6%  | 4.6E-04 | 12.4% | coding-synon |             |
| NRC868     | 12 | 11094932 | 16.1% | 1.1E-02 | 1.00 | 1.5E-02 | 6.4%  | 3.7E-01 | 0.9%  | intron       | deleterious |
| NRC476     | 12 | 11030202 | 16.7% | 5.2E-01 | 1.00 | 7.8E-03 | 7.5%  | 9.3E-01 | 0.0%  |              |             |
| NRC2154    | 12 | 11065639 | 16.7% | 8.3E-03 | 1.00 | 3.8E-01 | 0.9%  | 5.5E-02 | 4.1%  | intron       |             |
| rs7978808  | 12 | 11143651 | 17.2% | 6.0E-03 | 1.00 | 2.9E-01 | 1.3%  | 1.9E-02 | 6.0%  | utr-5        |             |
| rs10845294 | 12 | 11074553 | 17.8% | 6.8E-02 | 1.00 | 5.2E-01 | 0.5%  | 4.8E-03 | 8.4%  | intron       |             |
| NRC2401    | 12 | 11105295 | 17.8% | 4.2E-03 | 1.00 | 5.5E-01 | 0.4%  | 9.5E-01 | 0.0%  | intron       |             |
| rs10845289 | 12 | 11058493 | 18.4% | 3.4E-01 | 1.00 | 4.6E-01 | 0.6%  | 8.9E-03 | 7.3%  | coding-synon |             |
| NRC328     | 12 | 11083774 | 18.4% | 3.4E-01 | 1.00 | 4.6E-01 | 0.6%  | 8.9E-03 | 7.3%  | intron       |             |
| rs10845288 | 12 | 11055798 | 19.0% | 2.7E-01 | 1.00 | 4.7E-01 | 0.6%  | 9.5E-03 | 7.2%  | intron       |             |
| rs7966304  | 12 | 11094968 | 19.0% | 2.7E-01 | 1.00 | 4.9E-01 | 0.6%  | 7.1E-03 | 7.7%  | intron       |             |
| NRC2621    | 12 | 11135992 | 19.0% | 2.0E-03 | 1.00 | 6.0E-02 | 3.9%  | 7.3E-03 | 7.6%  | intron       |             |
| rs11054148 | 12 | 11045311 | 19.5% | 1.1E-01 | 1.00 | 7.5E-01 | 0.1%  | 2.6E-03 | 9.4%  | intron       |             |
| NRC1374    | 12 | 11074957 | 19.5% | 1.4E-03 | 1.00 | 2.0E-01 | 1.9%  | 6.6E-01 | 0.2%  | intron       |             |
| rs34373072 | 12 | 11080752 | 19.5% | 1.1E-01 | 1.00 | 7.5E-01 | 0.1%  | 2.6E-03 | 9.4%  | intron       |             |
| rs35304582 | 12 | 11091123 | 19.5% | 1.1E-01 | 1.00 | 7.5E-01 | 0.1%  | 2.6E-03 | 9.4%  | intron       |             |
| rs35062230 | 12 | 11092677 | 19.5% | 1.1E-01 | 1.00 | 7.5E-01 | 0.1%  | 2.6E-03 | 9.4%  | intron       |             |
| rs7973242  | 12 | 11099772 | 19.5% | 1.1E-01 | 1.00 | 7.5E-01 | 0.1%  | 2.6E-03 | 9.4%  | intron       |             |
| NRC1681    | 12 | 11105653 | 19.5% | 1.4E-03 | 1.00 | 2.1E-01 | 1.8%  | 9.1E-01 | 0.0%  | intron       |             |
| rs61912112 | 12 | 11147851 | 19.5% | 1.1E-01 | 1.00 | 7.5E-01 | 0.1%  | 2.6E-03 | 9.4%  | intron       |             |
| rs35683753 | 12 | 11051659 | 20.1% | 1.6E-01 | 1.00 | 6.8E-01 | 0.2%  | 3.5E-03 | 8.9%  | intron       |             |
| rs12370363 | 12 | 11074779 | 20.1% | 1.6E-01 | 1.00 | 6.8E-01 | 0.2%  | 3.5E-03 | 8.9%  | intron       |             |
| NRC1750    | 12 | 11080220 | 20.7% | 5.8E-04 | 1.00 | 6.5E-01 | 0.2%  | 4.6E-01 | 0.6%  | intron       |             |
| NRC2115    | 12 | 11106124 | 20.7% | 5.8E-04 | 1.00 | 3.7E-02 | 4.8%  | 7.3E-01 | 0.1%  | intron       |             |
| rs35720106 | 12 | 11135433 | 20.7% | 5.8E-04 | 1.00 | 4.5E-02 | 4.4%  | 1.5E-02 | 6.4%  | intron       |             |

|                   |    |          |       |         |      |         |      |         |       |              |         |
|-------------------|----|----------|-------|---------|------|---------|------|---------|-------|--------------|---------|
| <b>rs11526470</b> | 12 | 11074808 | 21.3% | 3.7E-04 | 1.00 | 8.1E-01 | 0.1% | 3.5E-06 | 19.8% | intron       |         |
| <b>NRC2043</b>    | 12 | 11105722 | 23.0% | 8.2E-05 | 1.00 | 4.3E-01 | 0.7% | 5.4E-01 | 0.4%  | intron       |         |
| <b>rs11054143</b> | 12 | 11041586 | 24.1% | 9.5E-01 | 1.00 | 1.1E-01 | 2.8% | 3.4E-02 | 4.9%  | intron       |         |
| <b>NRC251</b>     | 12 | 11135461 | 24.1% | 1.1E-03 | 1.00 | 2.2E-01 | 1.7% | 1.2E-03 | 10.8% | intron       |         |
| <b>NRC1933</b>    | 12 | 11106137 | 24.7% | 1.5E-05 | 1.00 | 1.4E-01 | 2.5% | 5.9E-01 | 0.3%  | intron       |         |
| <b>rs12226919</b> | 12 | 11041300 | 28.7% | 1.7E-05 | 1.00 | 1.6E-01 | 2.2% | 2.2E-03 | 9.7%  | intron       |         |
| <b>rs1817043</b>  | 12 | 11107119 | 32.2% | 5.3E-04 | 1.00 | 3.0E-02 | 5.2% | 2.5E-01 | 1.5%  | intron       |         |
| <b>rs2257110</b>  | 12 | 11093789 | 32.8% | 9.7E-05 | 1.00 | 3.2E-02 | 5.0% | 2.4E-01 | 1.6%  | intron       |         |
| <b>rs2597974</b>  | 12 | 11144112 | 32.8% | 9.7E-05 | 1.00 | 3.2E-02 | 5.0% | 2.4E-01 | 1.6%  | intron       |         |
| <b>NRC287</b>     | 12 | 11121430 | 33.9% | 5.0E-05 | 1.00 | 2.1E-01 | 1.8% | 2.8E-04 | 13.2% | intron       | neutral |
| <b>rs1868769</b>  | 12 | 11066020 | 34.5% | 1.8E-03 | 1.00 | 3.8E-02 | 4.7% | 2.1E-01 | 1.8%  | intron       |         |
| <b>rs2597991</b>  | 12 | 11094910 | 36.2% | 7.9E-01 | 1.00 | 4.2E-01 | 0.8% | 7.4E-07 | 22.0% | intron       |         |
| <b>rs11533168</b> | 12 | 11117688 | 36.2% | 2.6E-03 | 1.00 | 7.9E-01 | 0.1% | 1.1E-07 | 24.5% |              |         |
| <b>rs10845295</b> | 12 | 11075099 | 37.4% | 1.2E-02 | 1.00 | 4.6E-01 | 0.6% | 2.7E-06 | 20.2% | intron       |         |
| <b>rs10772423</b> | 12 | 11074484 | 38.5% | 4.7E-02 | 1.00 | 3.9E-01 | 0.8% | 1.5E-06 | 21.1% | intron       |         |
| <b>rs7134036</b>  | 12 | 11076851 | 38.5% | 4.7E-02 | 1.00 | 3.9E-01 | 0.8% | 1.5E-06 | 21.1% | missense     |         |
| <b>rs7134148</b>  | 12 | 11076915 | 38.5% | 4.7E-02 | 1.00 | 3.9E-01 | 0.8% | 1.5E-06 | 21.1% | coding-synon |         |
| <b>rs2708380</b>  | 12 | 11105479 | 38.5% | 4.7E-02 | 1.00 | 4.7E-01 | 0.6% | 2.8E-07 | 23.3% | intron       |         |
| <b>NRC2023</b>    | 12 | 11137838 | 38.5% | 1.3E-02 | 1.00 | 6.2E-01 | 0.3% | 9.5E-04 | 11.2% | intron       |         |
| <b>rs6488334</b>  | 12 | 11031711 | 39.1% | 1.9E-05 | 1.00 | 7.2E-01 | 0.2% | 4.3E-01 | 0.7%  | intron       |         |
| <b>rs10772418</b> | 12 | 11062010 | 39.1% | 8.4E-02 | 1.00 | 3.9E-01 | 0.8% | 1.9E-06 | 20.7% | intron       | neutral |
| <b>rs2597985</b>  | 12 | 11092754 | 39.1% | 8.4E-02 | 1.00 | 4.0E-01 | 0.8% | 7.4E-07 | 22.0% | intron       |         |
| <b>rs2044826</b>  | 12 | 11099773 | 39.1% | 8.4E-02 | 1.00 | 4.0E-01 | 0.8% | 7.4E-07 | 22.0% | missense     | neutral |
| <b>rs2597997</b>  | 12 | 11099817 | 39.1% | 8.4E-02 | 1.00 | 4.0E-01 | 0.8% | 7.4E-07 | 22.0% | missense     |         |
| <b>NRC1005</b>    | 12 | 11137826 | 40.2% | 1.3E-04 | 1.00 | 6.5E-01 | 0.2% | 3.3E-04 | 12.9% | coding-synon |         |
| <b>rs2599395</b>  | 12 | 11143746 | 40.2% | 1.9E-03 | 1.00 | 4.5E-01 | 0.6% | 3.8E-07 | 22.9% | coding-synon |         |
| <b>rs10772420</b> | 12 | 11065543 | 40.8% | 4.6E-03 | 1.00 | 3.5E-01 | 1.0% | 1.1E-06 | 21.5% | coding-synon |         |
| <b>rs10845293</b> | 12 | 11074522 | 40.8% | 4.6E-03 | 1.00 | 3.5E-01 | 1.0% | 1.1E-06 | 21.5% | intron       |         |
| <b>rs2443093</b>  | 12 | 11142160 | 41.4% | 1.0E-02 | 1.00 | 3.6E-01 | 1.0% | 5.4E-07 | 22.4% |              |         |
| <b>rs2600335</b>  | 12 | 11143187 | 41.4% | 1.0E-02 | 1.00 | 3.6E-01 | 1.0% | 5.4E-07 | 22.4% |              |         |
| <b>NRC1108</b>    | 12 | 11121486 | 42.0% | 6.7E-01 | 1.00 | 4.1E-01 | 0.8% | 1.6E-03 | 10.3% |              |         |
| <b>NRC227</b>     | 12 | 11135457 | 42.0% | 2.9E-01 | 1.00 | 2.4E-01 | 1.6% | 3.7E-06 | 19.8% | intron       |         |
| <b>NRC55</b>      | 12 | 11135416 | 43.1% | 9.2E-01 | 1.00 | 3.0E-01 | 1.2% | 1.8E-02 | 6.0%  | intron       |         |
| <b>NRC321</b>     | 12 | 11121437 | 44.8% | 3.6E-01 | 1.00 | 4.4E-01 | 0.7% | 6.6E-04 | 11.8% |              |         |
| <b>rs10772408</b> | 12 | 11042866 | 48.3% | 6.6E-01 | 1.00 | 8.8E-02 | 3.2% | 5.2E-01 | 0.5%  | intron       |         |
| <b>NRC2130</b>    | 12 | 11117757 | 48.9% | 2.2E-02 | 1.00 | 1.3E-01 | 2.6% | 3.4E-03 | 9.0%  | utr-3        | neutral |
| <b>NRC1656</b>    | 12 | 11121670 | 49.4% | 1.4E-03 | 1.00 | 3.7E-01 | 0.9% | 2.9E-03 | 9.3%  |              |         |
| <b>rs6488335</b>  | 12 | 11031750 | 50.0% | 4.9E-02 | 1.00 | 1.5E-01 | 2.3% | 1.0E-03 | 11.1% | intron       |         |
| <b>NRC1312</b>    | 12 | 11121636 | 50.0% | 4.9E-04 | 1.00 | 2.5E-01 | 1.5% | 4.1E-03 | 8.7%  | intron       |         |
